# Supplementary material
Source: HighWire-hosted journal article supplement (https://www.cmaj.ca/content/suppl/2021/02/04/193.6.E200)
Supplement: 202303-res-2-at.pdf [file 202303-res-2-at.pdf]

## Appendix 2 (as submitted by the authors): Supplementary tables

Interrupted time series analyses comparing the earlier (Apr. 1, 2020 to May 26, 2020) and later (May 27, 2020 to July 28, 2020) COVID-19 periods

| A. Daily total visits: the MODEL procedure                                                                                                                                                                                                                                                                                                                                                                                                                                                                                                                                                                          |          |                  |          |          |                 |                 |                    |
|---------------------------------------------------------------------------------------------------------------------------------------------------------------------------------------------------------------------------------------------------------------------------------------------------------------------------------------------------------------------------------------------------------------------------------------------------------------------------------------------------------------------------------------------------------------------------------------------------------------------|----------|------------------|----------|----------|-----------------|-----------------|--------------------|
| <i>Nonlinear OLS summary of residual errors</i>                                                                                                                                                                                                                                                                                                                                                                                                                                                                                                                                                                     |          |                  |          |          |                 |                 |                    |
| Equation                                                                                                                                                                                                                                                                                                                                                                                                                                                                                                                                                                                                            | DF model | DF error         | SSE      | MSE      | Root MSE        | R <sup>2</sup>  | Adj R <sup>2</sup> |
| Daily total                                                                                                                                                                                                                                                                                                                                                                                                                                                                                                                                                                                                         | 4        | 13               | 43337373 | 3333644  | 1825.8          | 0.9463          | 0.9339             |
| <i>Nonlinear OLS parameter estimates</i>                                                                                                                                                                                                                                                                                                                                                                                                                                                                                                                                                                            |          |                  |          |          |                 |                 |                    |
| Parameter                                                                                                                                                                                                                                                                                                                                                                                                                                                                                                                                                                                                           | Estimate | Approx std error | t value  | Approx   |                 |                 |                    |
|                                                                                                                                                                                                                                                                                                                                                                                                                                                                                                                                                                                                                     |          |                  |          | Pr >  t  | 95% lower limit | 95% upper limit |                    |
| b0                                                                                                                                                                                                                                                                                                                                                                                                                                                                                                                                                                                                                  | 68522    | 1422.7           | 48.16    | < 0.0001 | 65733           | 71310           |                    |
| b1                                                                                                                                                                                                                                                                                                                                                                                                                                                                                                                                                                                                                  | 1509     | 281.7            | 5.36     | 0.0001   | 957             | 2061            |                    |
| b2                                                                                                                                                                                                                                                                                                                                                                                                                                                                                                                                                                                                                  | 4534     | 1774.4           | 2.56     | 0.0239   | 1057            | 8012            |                    |
| b3                                                                                                                                                                                                                                                                                                                                                                                                                                                                                                                                                                                                                  | -992     | 367.3            | -2.7     | 0.0182   | -1712           | -272            |                    |
| b1+b3                                                                                                                                                                                                                                                                                                                                                                                                                                                                                                                                                                                                               | 517      | 235.6250836      |          | 0.0282   | 55              | 979             |                    |
| <p><b>Interpretation:</b> In the earlier COVID period, there was a significant trend in average daily total visits, increasing by 1509 per week (b1). There was a significant level change between the early and subsequent COVID periods (b2). The trend in the subsequent COVID period was significantly different from the trend in the earlier COVID period (b3). In the subsequent COVID period, there was a significant trend in average daily total visits, increasing by 517 per week (b1+b3). Total daily visits showed a smaller increase in the later COVID period than in the earlier COVID period.</p> |          |                  |          |          |                 |                 |                    |

**B. Daily office visits: the MODEL procedure***Nonlinear OLS summary of residual errors*

| Equation     | DF model | DF error | SSE     | MSE    | Root MSE | R <sup>2</sup> | Adj R <sup>2</sup> |
|--------------|----------|----------|---------|--------|----------|----------------|--------------------|
| Daily office | 4        | 13       | 6573475 | 505652 | 711.1    | 0.9921         | 0.9902             |

*Nonlinear OLS parameter estimates*

| Parameter | Estimate | Approx std error | t value | Approx   |                 |                 |  |
|-----------|----------|------------------|---------|----------|-----------------|-----------------|--|
|           |          |                  |         | Pr >  t  | 95% lower limit | 95% upper limit |  |
| b0        | 9706     | 554.1            | 17.52   | < 0.0001 | 8620            | 10 792          |  |
| b1        | 993      | 109.7            | 9.05    | < 0.0001 | 778             | 1208            |  |
| b2        | 1980     | 691.1            | 2.87    | 0.0133   | 626             | 3335            |  |
| b3        | 417      | 143.1            | 2.92    | 0.012    | 137             | 698             |  |
| b1+b3     | 1410     | 91.83158498      |         | < 0.0001 | 1230            | 1590            |  |

**Interpretation:** In the earlier COVID period, there was a significant trend in average daily office visits, increasing by 993 per week (b1). There was a significant level change between the early and subsequent COVID periods (b2). The trend in the subsequent COVID period was significantly different from the trend in the earlier COVID period (b3). In the subsequent COVID period, there was a significant trend in average daily office visits, increasing by 1410 per week (b1+b3). Office visits showed a larger increase in the later COVID period than in the earlier COVID period.

**C. Daily virtual visits: the MODEL procedure***Nonlinear OLS summary of residual errors*

| Equation      | DF model | DF error | SSE      | MSE     | Root MSE | R <sup>2</sup> | Adj R <sup>2</sup> |
|---------------|----------|----------|----------|---------|----------|----------------|--------------------|
| Daily virtual | 4        | 13       | 20515374 | 1578106 | 1256.2   | 0.7431         | 0.6839             |

*Nonlinear GMM parameter estimates*

| Parameter | Estimate | Approx std error | t value | Approx   |                 |                 |  |
|-----------|----------|------------------|---------|----------|-----------------|-----------------|--|
|           |          |                  |         | Pr >  t  | 95% lower limit | 95% upper limit |  |
| b0        | 58552    | 978.8            | 59.82   | < 0.0001 | 56634           | 60471           |  |
| b1        | 512      | 193.8            | 2.64    | 0.0203   | 132             | 892             |  |
| b2        | 2537     | 1220.8           | 2.08    | 0.0581   | 144             | 4930            |  |
| b3        | -1409    | 252.7            | -5.57   | < 0.0001 | -1904           | -913            |  |
| b1+b3     | -897     | 162.0738412      |         | < 0.0001 | -1214           | -579            |  |

**Interpretation**

In the earlier COVID period, there was a significant trend in average daily virtual visits, increasing by 512 per week (b1). There was no significant level change between the early and subsequent COVID periods (b2). The trend in the subsequent COVID period was significantly different from the trend in the earlier COVID period (b3). In the subsequent COVID period, there was a significant trend in average daily virtual visits, decreasing by 897 per week (b1+b3). Virtual visits showed a decreasing trend in the later COVID period following an increasing trend in the earlier COVID period.
